# Supplementary material for: Development of a New Indirect ELISA Test for the Detection of Anti-Feline Coronavirus Antibodies in Cats
Source: MDPI journal article supplement (doi:10.3390/vetsci12030245), 2025-03-04
Supplement: s1 [file s1]

**Supplementary Table S1. Preliminary ELISA results on Nunc MaxiSorp plate.**

Absorbance values obtained on Nunc MaxiSorp microplates coated with 0, 2.5, 5, 10, and 20 µg/mL of FCoV antigen diluted in CB buffer pH 9.6 or in PBS 1X and blocked in PBS containing 1% BSA. The conjugate antibody was tested at dilutions ranging from 1:5,000 to 1:20,000. Samples: one positive, one negative (dilution 1:200, 50 µL/well). n.d.: not determined.

| Sample   | FCoV antigen (µg/mL) | Coating: CB buffer pH 9.6 |          |          |       | Coating: PBS |          |          |       |
|----------|----------------------|---------------------------|----------|----------|-------|--------------|----------|----------|-------|
|          |                      | 1:5,000                   | 1:10,000 | 1:20,000 | 0     | 1:5,000      | 1:10,000 | 1:20,000 | 0     |
| Positive | 20.0                 | 1.149                     | n.d.     | n.d.     | n.d.  | n.d.         | n.d.     | n.d.     | n.d.  |
|          | 10.0                 | 0.902                     | 0.397    | 0.224    | 0.044 | 0.718        | 0.361    | 0.221    | 0.043 |
|          | 5.0                  | 0.718                     | 0.274    | 0.161    | 0.041 | 0.456        | 0.251    | 0.161    | 0.041 |
|          | 2.5                  | 0.271                     | 0.163    | 0.100    | 0.042 | 0.257        | 0.152    | 0.098    | 0.040 |
|          | 0                    | 0.097                     | 0.068    | 0.054    | 0.041 | 0.103        | 0.079    | 0.056    | 0.040 |
| Negative | 20.0                 | 0.104                     | n.d.     | n.d.     | n.d.  | n.d.         | n.d.     | n.d.     | n.d.  |
|          | 10.0                 | 0.104                     | n.d.     | n.d.     | n.d.  | n.d.         | n.d.     | n.d.     | n.d.  |
|          | 5.0                  | 0.107                     | n.d.     | n.d.     | n.d.  | n.d.         | n.d.     | n.d.     | n.d.  |
|          | 0                    | 0.099                     | n.d.     | n.d.     | n.d.  | n.d.         | n.d.     | n.d.     | n.d.  |

**Supplementary Table S2. Performance of FCoV CHECK Ab ELISA at sample dilutions 1:100 or 1:200 against IFAT as reference assay.** Number of samples analysed: 110. Discordant results are highlighted in bold and marked with an asterisk. OD: optical density. POS: positive; NEG: negative.

| N. sample  | IFAT       | Sample dilution 1:200 |            | Sample dilution 1:100 |            |
|------------|------------|-----------------------|------------|-----------------------|------------|
|            |            | OD                    | Results    | OD                    | Results    |
| 1          | NEG        | 0.167                 | NEG        | 0.105                 | NEG        |
| 2          | NEG        | 0.117                 | NEG        | 0.129                 | NEG        |
| 3          | NEG        | 0.083                 | NEG        | 0.079                 | NEG        |
| 4          | NEG        | 0.102                 | NEG        | 0.097                 | NEG        |
| 5          | NEG        | 0.073                 | NEG        | 0.082                 | NEG        |
| 6          | NEG        | 0.070                 | NEG        | 0.070                 | NEG        |
| 7          | NEG        | 0.062                 | NEG        | 0.061                 | NEG        |
| 8          | NEG        | 0.055                 | NEG        | 0.052                 | NEG        |
| 9          | NEG        | 0.221                 | NEG        | 0.237                 | NEG        |
| 10         | NEG        | 0.058                 | NEG        | 0.053                 | NEG        |
| 11         | NEG        | 0.095                 | NEG        | 0.096                 | NEG        |
| 12         | NEG        | 0.068                 | NEG        | 0.066                 | NEG        |
| 13         | NEG        | 0.076                 | NEG        | 0.063                 | NEG        |
| 14         | NEG        | 0.058                 | NEG        | 0.062                 | NEG        |
| 15         | NEG        | 0.074                 | NEG        | 0.067                 | NEG        |
| 16         | NEG        | 0.108                 | NEG        | 0.123                 | NEG        |
| 17         | NEG        | 0.054                 | NEG        | 0.051                 | NEG        |
| 18         | NEG        | 0.074                 | NEG        | 0.081                 | NEG        |
| 19         | NEG        | 0.059                 | NEG        | 0.063                 | NEG        |
| 20         | NEG        | 0.077                 | NEG        | 0.083                 | NEG        |
| 21         | NEG        | 0.095                 | NEG        | 0.090                 | NEG        |
| 22         | NEG        | 0.162                 | NEG        | 0.180                 | NEG        |
| 23         | NEG        | 0.073                 | NEG        | 0.067                 | NEG        |
| <b>24*</b> | <b>POS</b> | <b>0.097</b>          | <b>NEG</b> | <b>0.110</b>          | <b>NEG</b> |
| 25         | NEG        | 0.059                 | NEG        | 0.062                 | NEG        |
| 26         | NEG        | 0.246                 | NEG        | 0.241                 | NEG        |
| 27         | NEG        | 0.071                 | NEG        | 0.070                 | NEG        |
| 28         | NEG        | 0.077                 | NEG        | 0.075                 | NEG        |
| <b>29*</b> | <b>POS</b> | <b>0.078</b>          | <b>NEG</b> | <b>0.070</b>          | <b>NEG</b> |
| 30         | NEG        | 0.088                 | NEG        | 0.072                 | NEG        |
| 31         | NEG        | 0.096                 | NEG        | 0.105                 | NEG        |
| 32         | NEG        | 0.143                 | NEG        | 0.157                 | NEG        |
| 33         | POS        | 0.589                 | POS        | 0.694                 | POS        |
| 34         | POS        | 1.332                 | POS        | 1.434                 | POS        |
| 35         | NEG        | 0.220                 | NEG        | 0.262                 | NEG        |
| 36         | NEG        | 0.109                 | NEG        | 0.117                 | NEG        |
| 37         | NEG        | 0.114                 | NEG        | 0.141                 | NEG        |
| 38         | POS        | 0.771                 | POS        | 0.865                 | POS        |
| 39         | POS        | 0.282                 | POS        | 0.371                 | POS        |
| 40         | NEG        | 0.090                 | NEG        | 0.098                 | NEG        |
| 41         | POS        | 0.493                 | POS        | 0.551                 | POS        |
| 42         | NEG        | 0.079                 | NEG        | 0.086                 | NEG        |
| <b>43*</b> | <b>POS</b> | <b>0.192</b>          | <b>NEG</b> | 0.308                 | POS        |
| 44         | POS        | 0.727                 | POS        | 0.735                 | POS        |
| 45         | NEG        | 0.076                 | NEG        | 0.068                 | NEG        |
| 46         | POS        | 0.409                 | POS        | 0.494                 | POS        |
| 47         | POS        | 0.362                 | POS        | 0.591                 | POS        |
| 48         | POS        | 0.418                 | POS        | 0.385                 | POS        |
| 49         | POS        | 0.562                 | POS        | 0.662                 | POS        |

*Continued on the next page*

Supplementary Table S2 (continued)

| N. sample  | IFAT       | Sample dilution 1:200 |            | Sample dilution 1:100 |            |
|------------|------------|-----------------------|------------|-----------------------|------------|
|            |            | OD                    | Results    | OD                    | Results    |
| 50         | POS        | 0.418                 | POS        | 0.447                 | POS        |
| 51         | NEG        | 0.153                 | NEG        | 0.189                 | NEG        |
| 52         | POS        | 0.465                 | POS        | 0.567                 | POS        |
| 53         | NEG        | 0.233                 | NEG        | 0.289                 | NEG        |
| 54         | POS        | 1.452                 | POS        | 1.455                 | POS        |
| 55         | NEG        | 0.099                 | NEG        | 0.088                 | NEG        |
| <b>56*</b> | <b>POS</b> | <b>0.178</b>          | <b>NEG</b> | 0.316                 | POS        |
| 57         | POS        | 1.651                 | POS        | 1.599                 | POS        |
| 58         | NEG        | 0.188                 | NEG        | 0.253                 | NEG        |
| 59         | POS        | 1.065                 | POS        | 1.116                 | POS        |
| 60         | NEG        | 0.163                 | NEG        | 0.120                 | NEG        |
| 61         | POS        | 0.617                 | POS        | 0.660                 | POS        |
| <b>62*</b> | <b>POS</b> | <b>0.171</b>          | <b>NEG</b> | 0.309                 | POS        |
| 63         | NEG        | 0.117                 | NEG        | 0.145                 | NEG        |
| 64         | NEG        | 0.168                 | NEG        | 0.215                 | NEG        |
| 65         | POS        | 0.740                 | POS        | 0.768                 | POS        |
| 66         | POS        | 0.385                 | POS        | 0.416                 | POS        |
| <b>67*</b> | <b>POS</b> | <b>0.082</b>          | <b>NEG</b> | <b>0.085</b>          | <b>NEG</b> |
| 68         | POS        | 1.790                 | POS        | 1.507                 | POS        |
| 69         | NEG        | 0.064                 | NEG        | 0.066                 | NEG        |
| 70         | POS        | 0.699                 | POS        | 0.876                 | POS        |
| <b>71*</b> | <b>POS</b> | <b>0.194</b>          | <b>NEG</b> | 0.311                 | POS        |
| <b>72*</b> | <b>POS</b> | <b>0.220</b>          | <b>NEG</b> | 0.349                 | POS        |
| <b>73*</b> | <b>POS</b> | <b>0.128</b>          | <b>NEG</b> | 0.363                 | POS        |
| 74         | NEG        | 0.146                 | NEG        | 0.205                 | NEG        |
| <b>75*</b> | <b>POS</b> | <b>0.190</b>          | <b>NEG</b> | 0.318                 | POS        |
| <b>76*</b> | <b>POS</b> | <b>0.078</b>          | <b>NEG</b> | <b>0.088</b>          | <b>NEG</b> |
| 77         | POS        | 1.337                 | POS        | 1.421                 | POS        |
| <b>78*</b> | <b>POS</b> | <b>0.237</b>          | <b>NEG</b> | 0.305                 | POS        |
| 79         | POS        | 1.003                 | POS        | 1.124                 | POS        |
| 80         | POS        | 1.162                 | POS        | 1.095                 | POS        |
| 81         | POS        | 0.709                 | POS        | 1.011                 | POS        |
| 82         | POS        | 0.376                 | POS        | 0.388                 | POS        |
| 83         | POS        | 1.061                 | POS        | 1.195                 | POS        |
| 84         | NEG        | 0.092                 | NEG        | 0.108                 | NEG        |
| 85         | POS        | 0.269                 | POS        | 0.435                 | POS        |
| 86         | POS        | 0.369                 | POS        | 0.549                 | POS        |
| 87         | POS        | 0.528                 | POS        | 0.625                 | POS        |
| 88         | POS        | 0.465                 | POS        | 0.519                 | POS        |
| 89         | POS        | 0.542                 | POS        | 0.650                 | POS        |
| <b>90*</b> | <b>POS</b> | <b>0.213</b>          | <b>NEG</b> | 0.313                 | POS        |
| 91         | POS        | 1.500                 | POS        | 1.376                 | POS        |
| 92         | POS        | 0.939                 | POS        | 0.883                 | POS        |
| 93         | NEG        | 0.072                 | NEG        | 0.083                 | NEG        |
| 94         | NEG        | 0.075                 | NEG        | 0.089                 | NEG        |
| 95         | POS        | 0.268                 | POS        | 0.337                 | POS        |
| <b>96*</b> | <b>POS</b> | <b>0.132</b>          | <b>NEG</b> | 0.335                 | POS        |
| 97         | POS        | 0.801                 | POS        | 0.808                 | POS        |
| 98         | POS        | 0.292                 | POS        | 0.323                 | POS        |
| 99         | POS        | 0.811                 | POS        | 0.995                 | POS        |

Continued on the next page

**Supplementary Table S2** (*continued*)

| N. sample   | IFAT       | Sample dilution 1:200 |            | Sample dilution 1:100 |         |
|-------------|------------|-----------------------|------------|-----------------------|---------|
|             |            | OD                    | Results    | OD                    | Results |
| 100         | POS        | 1.216                 | POS        | 1.032                 | POS     |
| 101         | POS        | 0.723                 | POS        | 0.727                 | POS     |
| 102         | POS        | 1.781                 | POS        | 1.497                 | POS     |
| 103         | POS        | 1.123                 | POS        | 1.064                 | POS     |
| 104         | POS        | 0.506                 | POS        | 0.575                 | POS     |
| 105         | POS        | 1.230                 | POS        | 1.236                 | POS     |
| 106         | POS        | 1.183                 | POS        | 1.112                 | POS     |
| 107         | POS        | 1.298                 | POS        | 1.074                 | POS     |
| <b>108*</b> | <b>POS</b> | <b>0.205</b>          | <b>NEG</b> | 0.304                 | POS     |
| 109         | POS        | 1.605                 | POS        | 1.431                 | POS     |
| 110         | POS        | 2.095                 | POS        | 1.733                 | POS     |

**Supplementary Table S3. Positive and negative controls selection.** Results are expressed as mean OD  $\pm$  SD. PC: positive control formed by a mixture of anti-FIPV antibody and protein G-HRP. NC: negative control, sample diluent. Negative samples: 48 samples tested at dilution 1:100. Good results, selected for costs and performances reasons, are highlighted in bold and marked with an asterisk; n: number of tests.

| Samples          | N.        | Anti-FIPV antibody | Protein G-HRP | Results (OD $\pm$ SD)    |
|------------------|-----------|--------------------|---------------|--------------------------|
| PC               | <b>1*</b> | 1:300              | 1:500         | 3.338 $\pm$ 0.045 (n=4)  |
|                  | 2         | 1:600              | 1:500         | 2.561 $\pm$ 0.043 (n=2)  |
|                  | <b>3*</b> | 1:600              | 1:800         | 2.631 $\pm$ 0.016 (n=2)  |
|                  | 4         | 1:600              | 1:1,200       | 2.426 $\pm$ 0.005 (n=2)  |
|                  | 5         | 1:600              | 1:1,800       | 2.238 $\pm$ 0.038 (n=2)  |
|                  | <b>6*</b> | 1:800              | 1:300         | 2.632 $\pm$ 0.066 (n=2)  |
|                  | <b>7*</b> | 1:800              | 1:500         | 2.630 $\pm$ 0.016 (n=2)  |
|                  | 8         | 1:800              | 1:800         | 2.472 $\pm$ 0.039 (n=2)  |
|                  | 9         | 1:800              | 1:1,000       | 2.152 $\pm$ 0.015 (n=2)  |
|                  | 10        | 1:1000             | 1:500         | 2.098 $\pm$ 0.002 (n=2)  |
|                  | 11        | 1:1000             | 1:1,000       | 2.022 $\pm$ 0.021 (n=2)  |
|                  | 12        | 1:1000             | 1:2,000       | 1.051 $\pm$ 0.004 (n=2)  |
| NC               | -         | -                  | -             | 0.043 $\pm$ 0.002 (n=24) |
| Negative samples | -         | -                  | -             | 0.114 $\pm$ 0.063 (n=48) |

**Supplementary Table S4. Cut-off determination.** Sp: Specificity; Se: Sensitivity; PPV: positive predictive value; NPV: negative predictive value; LR+: positive likelihood ratio; LR-: negative likelihood ratio; J: Jouden's index.

| N. Cut-off | OD cut-off | Sp    | 1 - Sp | Se    | Se-Sp  | J     | VPP   | VPN   | Accuracy | LR +   | LR -  | J max |
|------------|------------|-------|--------|-------|--------|-------|-------|-------|----------|--------|-------|-------|
| 1          | 0.050      | 0.000 | 1.000  | 1.000 | 1.000  | 0.000 | 0.564 | -     | 0.564    | 1.000  | -     | 0.935 |
| 2          | 0.060      | 0.063 | 0.938  | 1.000 | 0.938  | 0.063 | 0.579 | 1.000 | 0.591    | 1.067  | 0.000 |       |
| 3          | 0.070      | 0.292 | 0.708  | 0.984 | 0.692  | 0.276 | 0.642 | 0.933 | 0.682    | 1.389  | 0.055 |       |
| 4          | 0.080      | 0.375 | 0.625  | 0.984 | 0.609  | 0.359 | 0.670 | 0.947 | 0.718    | 1.574  | 0.043 |       |
| 5          | 0.090      | 0.521 | 0.479  | 0.952 | 0.431  | 0.472 | 0.720 | 0.893 | 0.764    | 1.986  | 0.093 |       |
| 6          | 0.100      | 0.604 | 0.396  | 0.952 | 0.347  | 0.556 | 0.756 | 0.906 | 0.800    | 2.404  | 0.080 |       |
| 7          | 0.110      | 0.667 | 0.333  | 0.935 | 0.269  | 0.602 | 0.784 | 0.889 | 0.818    | 2.806  | 0.097 |       |
| 8          | 0.120      | 0.688 | 0.313  | 0.935 | 0.248  | 0.623 | 0.795 | 0.892 | 0.827    | 2.994  | 0.094 |       |
| 9          | 0.130      | 0.750 | 0.250  | 0.935 | 0.185  | 0.685 | 0.829 | 0.900 | 0.855    | 3.742  | 0.086 |       |
| 10         | 0.140      | 0.750 | 0.250  | 0.935 | 0.185  | 0.685 | 0.829 | 0.900 | 0.855    | 3.742  | 0.086 |       |
| 11         | 0.150      | 0.792 | 0.208  | 0.935 | 0.144  | 0.727 | 0.853 | 0.905 | 0.873    | 4.490  | 0.081 |       |
| 12         | 0.160      | 0.813 | 0.188  | 0.935 | 0.123  | 0.748 | 0.866 | 0.907 | 0.882    | 4.989  | 0.079 |       |
| 13         | 0.170      | 0.813 | 0.188  | 0.935 | 0.123  | 0.748 | 0.866 | 0.907 | 0.882    | 4.989  | 0.079 |       |
| 14         | 0.180      | 0.813 | 0.188  | 0.935 | 0.123  | 0.748 | 0.866 | 0.907 | 0.882    | 4.989  | 0.079 |       |
| 15         | 0.190      | 0.854 | 0.146  | 0.935 | 0.081  | 0.790 | 0.892 | 0.911 | 0.900    | 6.415  | 0.076 |       |
| 16         | 0.200      | 0.854 | 0.146  | 0.935 | 0.081  | 0.790 | 0.892 | 0.911 | 0.900    | 6.415  | 0.076 |       |
| 17         | 0.210      | 0.875 | 0.125  | 0.935 | 0.060  | 0.810 | 0.906 | 0.913 | 0.909    | 7.484  | 0.074 |       |
| 18         | 0.220      | 0.896 | 0.104  | 0.935 | 0.040  | 0.831 | 0.921 | 0.915 | 0.918    | 8.981  | 0.072 |       |
| 19         | 0.230      | 0.896 | 0.104  | 0.935 | 0.040  | 0.831 | 0.921 | 0.915 | 0.918    | 8.981  | 0.072 |       |
| 20         | 0.240      | 0.917 | 0.083  | 0.935 | 0.019  | 0.852 | 0.935 | 0.917 | 0.927    | 11.226 | 0.070 |       |
| 21         | 0.250      | 0.938 | 0.063  | 0.935 | -0.002 | 0.873 | 0.951 | 0.918 | 0.936    | 14.968 | 0.069 |       |
| 22         | 0.260      | 0.958 | 0.042  | 0.935 | -0.023 | 0.894 | 0.967 | 0.920 | 0.945    | 22.452 | 0.067 |       |
| 23         | 0.270      | 0.979 | 0.021  | 0.935 | -0.044 | 0.915 | 0.983 | 0.922 | 0.955    | 44.903 | 0.066 |       |
| 24         | 0.280      | 0.979 | 0.021  | 0.935 | -0.044 | 0.915 | 0.983 | 0.922 | 0.955    | 44.903 | 0.066 |       |
| 25         | 0.290      | 1.000 | 0.000  | 0.935 | -0.065 | 0.935 | 1.000 | 0.923 | 0.964    | -      | 0.065 |       |
| 26         | 0.300      | 1.000 | 0.000  | 0.935 | -0.065 | 0.935 | 1.000 | 0.923 | 0.964    | -      | 0.065 |       |
| 27         | 0.310      | 1.000 | 0.000  | 0.887 | -0.113 | 0.887 | 1.000 | 0.873 | 0.936    | -      | 0.113 |       |
| 28         | 0.320      | 1.000 | 0.000  | 0.806 | -0.194 | 0.806 | 1.000 | 0.800 | 0.891    | -      | 0.194 |       |
| 29         | 0.330      | 1.000 | 0.000  | 0.790 | -0.210 | 0.790 | 1.000 | 0.787 | 0.882    | -      | 0.210 |       |
| 30         | 0.340      | 1.000 | 0.000  | 0.758 | -0.242 | 0.758 | 1.000 | 0.762 | 0.864    | -      | 0.242 |       |
| 31         | 0.350      | 1.000 | 0.000  | 0.742 | -0.258 | 0.742 | 1.000 | 0.750 | 0.855    | -      | 0.258 |       |
| 32         | 0.360      | 1.000 | 0.000  | 0.742 | -0.258 | 0.742 | 1.000 | 0.750 | 0.855    | -      | 0.258 |       |
| 33         | 0.370      | 1.000 | 0.000  | 0.726 | -0.274 | 0.726 | 1.000 | 0.738 | 0.845    | -      | 0.274 |       |
| 34         | 0.380      | 1.000 | 0.000  | 0.710 | -0.290 | 0.710 | 1.000 | 0.727 | 0.836    | -      | 0.290 |       |
| 35         | 0.390      | 1.000 | 0.000  | 0.677 | -0.323 | 0.677 | 1.000 | 0.706 | 0.818    | -      | 0.323 |       |
| 36         | 0.400      | 1.000 | 0.000  | 0.677 | -0.323 | 0.677 | 1.000 | 0.706 | 0.818    | -      | 0.323 |       |
| 37         | 0.410      | 1.000 | 0.000  | 0.677 | -0.323 | 0.677 | 1.000 | 0.706 | 0.818    | -      | 0.323 |       |
| 38         | 0.420      | 1.000 | 0.000  | 0.661 | -0.339 | 0.661 | 1.000 | 0.696 | 0.809    | -      | 0.339 |       |
| 39         | 0.430      | 1.000 | 0.000  | 0.661 | -0.339 | 0.661 | 1.000 | 0.696 | 0.809    | -      | 0.339 |       |
| 40         | 0.440      | 1.000 | 0.000  | 0.645 | -0.355 | 0.645 | 1.000 | 0.686 | 0.800    | -      | 0.355 |       |
| 41         | 0.450      | 1.000 | 0.000  | 0.629 | -0.371 | 0.629 | 1.000 | 0.676 | 0.791    | -      | 0.371 |       |
| 42         | 0.460      | 1.000 | 0.000  | 0.629 | -0.371 | 0.629 | 1.000 | 0.676 | 0.791    | -      | 0.371 |       |
| 43         | 0.470      | 1.000 | 0.000  | 0.629 | -0.371 | 0.629 | 1.000 | 0.676 | 0.791    | -      | 0.371 |       |
| 44         | 0.480      | 1.000 | 0.000  | 0.629 | -0.371 | 0.629 | 1.000 | 0.676 | 0.791    | -      | 0.371 |       |
| 45         | 0.490      | 1.000 | 0.000  | 0.629 | -0.371 | 0.629 | 1.000 | 0.676 | 0.791    | -      | 0.371 |       |
| 46         | 0.500      | 1.000 | 0.000  | 0.613 | -0.387 | 0.613 | 1.000 | 0.667 | 0.782    | -      | 0.387 |       |
| 47         | 0.510      | 1.000 | 0.000  | 0.613 | -0.387 | 0.613 | 1.000 | 0.667 | 0.782    | -      | 0.387 |       |
| 48         | 0.520      | 1.000 | 0.000  | 0.597 | -0.403 | 0.597 | 1.000 | 0.658 | 0.773    | -      | 0.403 |       |
| 49         | 0.530      | 1.000 | 0.000  | 0.597 | -0.403 | 0.597 | 1.000 | 0.658 | 0.773    | -      | 0.403 |       |
| 50         | 0.540      | 1.000 | 0.000  | 0.597 | -0.403 | 0.597 | 1.000 | 0.658 | 0.773    | -      | 0.403 |       |
| 51         | 0.550      | 1.000 | 0.000  | 0.581 | -0.419 | 0.581 | 1.000 | 0.649 | 0.764    | -      | 0.419 |       |
| 52         | 0.560      | 1.000 | 0.000  | 0.565 | -0.435 | 0.565 | 1.000 | 0.640 | 0.755    | -      | 0.435 |       |
| 53         | 0.570      | 1.000 | 0.000  | 0.548 | -0.452 | 0.548 | 1.000 | 0.632 | 0.745    | -      | 0.452 |       |

*Continued on the next page*

Supplementary Table S4 (continued)

| N. Cut-off | OD cut-off | Sp    | 1 - Sp | Se    | Se-Sp  | J     | VPP   | VPN   | Accuracy | LR + | LR -  |
|------------|------------|-------|--------|-------|--------|-------|-------|-------|----------|------|-------|
| 54         | 0.580      | 1.000 | 0.000  | 0.532 | -0.468 | 0.532 | 1.000 | 0.623 | 0.736    | -    | 0.468 |
| 55         | 0.590      | 1.000 | 0.000  | 0.532 | -0.468 | 0.532 | 1.000 | 0.623 | 0.736    | -    | 0.468 |
| 56         | 0.600      | 1.000 | 0.000  | 0.516 | -0.484 | 0.516 | 1.000 | 0.615 | 0.727    | -    | 0.484 |
| 57         | 0.610      | 1.000 | 0.000  | 0.516 | -0.484 | 0.516 | 1.000 | 0.615 | 0.727    | -    | 0.484 |
| 58         | 0.620      | 1.000 | 0.000  | 0.516 | -0.484 | 0.516 | 1.000 | 0.615 | 0.727    | -    | 0.484 |
| 59         | 0.630      | 1.000 | 0.000  | 0.500 | -0.500 | 0.500 | 1.000 | 0.608 | 0.718    | -    | 0.500 |
| 60         | 0.640      | 1.000 | 0.000  | 0.500 | -0.500 | 0.500 | 1.000 | 0.608 | 0.718    | -    | 0.500 |
| 61         | 0.650      | 1.000 | 0.000  | 0.500 | -0.500 | 0.500 | 1.000 | 0.608 | 0.718    | -    | 0.500 |
| 62         | 0.660      | 1.000 | 0.000  | 0.468 | -0.532 | 0.468 | 1.000 | 0.593 | 0.700    | -    | 0.532 |
| 63         | 0.670      | 1.000 | 0.000  | 0.452 | -0.548 | 0.452 | 1.000 | 0.585 | 0.691    | -    | 0.548 |
| 64         | 0.680      | 1.000 | 0.000  | 0.452 | -0.548 | 0.452 | 1.000 | 0.585 | 0.691    | -    | 0.548 |
| 65         | 0.690      | 1.000 | 0.000  | 0.452 | -0.548 | 0.452 | 1.000 | 0.585 | 0.691    | -    | 0.548 |
| 66         | 0.700      | 1.000 | 0.000  | 0.435 | -0.565 | 0.435 | 1.000 | 0.578 | 0.682    | -    | 0.565 |
| 67         | 0.710      | 1.000 | 0.000  | 0.435 | -0.565 | 0.435 | 1.000 | 0.578 | 0.682    | -    | 0.565 |
| 68         | 0.720      | 1.000 | 0.000  | 0.435 | -0.565 | 0.435 | 1.000 | 0.578 | 0.682    | -    | 0.565 |
| 69         | 0.730      | 1.000 | 0.000  | 0.419 | -0.581 | 0.419 | 1.000 | 0.571 | 0.673    | -    | 0.581 |
| 70         | 0.740      | 1.000 | 0.000  | 0.403 | -0.597 | 0.403 | 1.000 | 0.565 | 0.664    | -    | 0.597 |
| 71         | 0.750      | 1.000 | 0.000  | 0.403 | -0.597 | 0.403 | 1.000 | 0.565 | 0.664    | -    | 0.597 |
| 72         | 0.760      | 1.000 | 0.000  | 0.403 | -0.597 | 0.403 | 1.000 | 0.565 | 0.664    | -    | 0.597 |
| 73         | 0.770      | 1.000 | 0.000  | 0.387 | -0.613 | 0.387 | 1.000 | 0.558 | 0.655    | -    | 0.613 |
| 74         | 0.780      | 1.000 | 0.000  | 0.387 | -0.613 | 0.387 | 1.000 | 0.558 | 0.655    | -    | 0.613 |
| 75         | 0.790      | 1.000 | 0.000  | 0.387 | -0.613 | 0.387 | 1.000 | 0.558 | 0.655    | -    | 0.613 |
| 76         | 0.800      | 1.000 | 0.000  | 0.387 | -0.613 | 0.387 | 1.000 | 0.558 | 0.655    | -    | 0.613 |
| 77         | 0.810      | 1.000 | 0.000  | 0.371 | -0.629 | 0.371 | 1.000 | 0.552 | 0.645    | -    | 0.629 |
| 78         | 0.820      | 1.000 | 0.000  | 0.371 | -0.629 | 0.371 | 1.000 | 0.552 | 0.645    | -    | 0.629 |
| 79         | 0.830      | 1.000 | 0.000  | 0.371 | -0.629 | 0.371 | 1.000 | 0.552 | 0.645    | -    | 0.629 |
| 80         | 0.840      | 1.000 | 0.000  | 0.371 | -0.629 | 0.371 | 1.000 | 0.552 | 0.645    | -    | 0.629 |
| 81         | 0.850      | 1.000 | 0.000  | 0.371 | -0.629 | 0.371 | 1.000 | 0.552 | 0.645    | -    | 0.629 |
| 82         | 0.860      | 1.000 | 0.000  | 0.371 | -0.629 | 0.371 | 1.000 | 0.552 | 0.645    | -    | 0.629 |
| 83         | 0.870      | 1.000 | 0.000  | 0.355 | -0.645 | 0.355 | 1.000 | 0.545 | 0.636    | -    | 0.645 |
| 84         | 0.880      | 1.000 | 0.000  | 0.339 | -0.661 | 0.339 | 1.000 | 0.539 | 0.627    | -    | 0.661 |
| 85         | 0.890      | 1.000 | 0.000  | 0.323 | -0.677 | 0.323 | 1.000 | 0.533 | 0.618    | -    | 0.677 |
| 86         | 0.900      | 1.000 | 0.000  | 0.323 | -0.677 | 0.323 | 1.000 | 0.533 | 0.618    | -    | 0.677 |
| 87         | 0.910      | 1.000 | 0.000  | 0.323 | -0.677 | 0.323 | 1.000 | 0.533 | 0.618    | -    | 0.677 |
| 88         | 0.920      | 1.000 | 0.000  | 0.323 | -0.677 | 0.323 | 1.000 | 0.533 | 0.618    | -    | 0.677 |
| 89         | 0.930      | 1.000 | 0.000  | 0.323 | -0.677 | 0.323 | 1.000 | 0.533 | 0.618    | -    | 0.677 |
| 90         | 0.940      | 1.000 | 0.000  | 0.323 | -0.677 | 0.323 | 1.000 | 0.533 | 0.618    | -    | 0.677 |
| 91         | 0.950      | 1.000 | 0.000  | 0.323 | -0.677 | 0.323 | 1.000 | 0.533 | 0.618    | -    | 0.677 |
| 92         | 0.960      | 1.000 | 0.000  | 0.323 | -0.677 | 0.323 | 1.000 | 0.533 | 0.618    | -    | 0.677 |
| 93         | 0.970      | 1.000 | 0.000  | 0.323 | -0.677 | 0.323 | 1.000 | 0.533 | 0.618    | -    | 0.677 |
| 94         | 0.980      | 1.000 | 0.000  | 0.323 | -0.677 | 0.323 | 1.000 | 0.533 | 0.618    | -    | 0.677 |
| 95         | 0.990      | 1.000 | 0.000  | 0.323 | -0.677 | 0.323 | 1.000 | 0.533 | 0.618    | -    | 0.677 |
| 96         | 1.000      | 1.000 | 0.000  | 0.306 | -0.694 | 0.306 | 1.000 | 0.527 | 0.609    | -    | 0.694 |
| 97         | 1.010      | 1.000 | 0.000  | 0.306 | -0.694 | 0.306 | 1.000 | 0.527 | 0.609    | -    | 0.694 |
| 98         | 1.020      | 1.000 | 0.000  | 0.290 | -0.710 | 0.290 | 1.000 | 0.522 | 0.600    | -    | 0.710 |
| 99         | 1.030      | 1.000 | 0.000  | 0.290 | -0.710 | 0.290 | 1.000 | 0.522 | 0.600    | -    | 0.710 |
| 100        | 1.040      | 1.000 | 0.000  | 0.274 | -0.726 | 0.274 | 1.000 | 0.516 | 0.591    | -    | 0.726 |
| 101        | 1.050      | 1.000 | 0.000  | 0.274 | -0.726 | 0.274 | 1.000 | 0.516 | 0.591    | -    | 0.726 |
| 102        | 1.060      | 1.000 | 0.000  | 0.274 | -0.726 | 0.274 | 1.000 | 0.505 | 0.583    | -    | 0.726 |
| 103        | 1.070      | 1.000 | 0.000  | 0.258 | -0.742 | 0.258 | 1.000 | 0.511 | 0.582    | -    | 0.742 |
| 104        | 1.080      | 1.000 | 0.000  | 0.242 | -0.758 | 0.242 | 1.000 | 0.505 | 0.573    | -    | 0.758 |

Continued on the next page

Supplementary Table S4 (continued)

| N. Cut-off | OD cut-off | Sp    | 1 - Sp | Se    | Se-Sp  | J     | VPP   | VPN   | Accuracy | LR + | LR -  |
|------------|------------|-------|--------|-------|--------|-------|-------|-------|----------|------|-------|
| 105        | 1.090      | 1.000 | 0.000  | 0.242 | -0.758 | 0.242 | 1.000 | 0.505 | 0.573    | -    | 0.758 |
| 106        | 1.100      | 1.000 | 0.000  | 0.226 | -0.774 | 0.226 | 1.000 | 0.500 | 0.564    | -    | 0.774 |
| 107        | 1.110      | 1.000 | 0.000  | 0.226 | -0.774 | 0.226 | 1.000 | 0.500 | 0.564    | -    | 0.774 |
| 108        | 1.120      | 1.000 | 0.000  | 0.194 | -0.806 | 0.194 | 1.000 | 0.490 | 0.545    | -    | 0.806 |
| 109        | 1.130      | 1.000 | 0.000  | 0.177 | -0.823 | 0.177 | 1.000 | 0.485 | 0.536    | -    | 0.823 |
| 110        | 1.140      | 1.000 | 0.000  | 0.177 | -0.823 | 0.177 | 1.000 | 0.485 | 0.536    | -    | 0.823 |
| 111        | 1.150      | 1.000 | 0.000  | 0.177 | -0.823 | 0.177 | 1.000 | 0.485 | 0.536    | -    | 0.823 |
| 112        | 1.160      | 1.000 | 0.000  | 0.177 | -0.823 | 0.177 | 1.000 | 0.485 | 0.536    | -    | 0.823 |
| 113        | 1.170      | 1.000 | 0.000  | 0.177 | -0.823 | 0.177 | 1.000 | 0.485 | 0.536    | -    | 0.823 |
| 114        | 1.180      | 1.000 | 0.000  | 0.177 | -0.823 | 0.177 | 1.000 | 0.485 | 0.536    | -    | 0.823 |
| 115        | 1.190      | 1.000 | 0.000  | 0.177 | -0.823 | 0.177 | 1.000 | 0.485 | 0.536    | -    | 0.823 |
| 116        | 1.200      | 1.000 | 0.000  | 0.161 | -0.839 | 0.161 | 1.000 | 0.480 | 0.527    | -    | 0.839 |
| 117        | 1.210      | 1.000 | 0.000  | 0.161 | -0.839 | 0.161 | 1.000 | 0.480 | 0.527    | -    | 0.839 |
| 118        | 1.220      | 1.000 | 0.000  | 0.161 | -0.839 | 0.161 | 1.000 | 0.480 | 0.527    | -    | 0.839 |
| 119        | 1.230      | 1.000 | 0.000  | 0.161 | -0.839 | 0.161 | 1.000 | 0.480 | 0.527    | -    | 0.839 |
| 120        | 1.240      | 1.000 | 0.000  | 0.145 | -0.855 | 0.145 | 1.000 | 0.475 | 0.518    | -    | 0.855 |
| 121        | 1.250      | 1.000 | 0.000  | 0.145 | -0.855 | 0.145 | 1.000 | 0.475 | 0.518    | -    | 0.855 |
| 122        | 1.260      | 1.000 | 0.000  | 0.145 | -0.855 | 0.145 | 1.000 | 0.475 | 0.518    | -    | 0.855 |
| 123        | 1.270      | 1.000 | 0.000  | 0.145 | -0.855 | 0.145 | 1.000 | 0.475 | 0.518    | -    | 0.855 |
| 124        | 1.280      | 1.000 | 0.000  | 0.145 | -0.855 | 0.145 | 1.000 | 0.475 | 0.518    | -    | 0.855 |
| 125        | 1.290      | 1.000 | 0.000  | 0.145 | -0.855 | 0.145 | 1.000 | 0.475 | 0.518    | -    | 0.855 |
| 126        | 1.300      | 1.000 | 0.000  | 0.145 | -0.855 | 0.145 | 1.000 | 0.475 | 0.518    | -    | 0.855 |
| 127        | 1.310      | 1.000 | 0.000  | 0.145 | -0.855 | 0.145 | 1.000 | 0.475 | 0.518    | -    | 0.855 |
| 128        | 1.320      | 1.000 | 0.000  | 0.145 | -0.855 | 0.145 | 1.000 | 0.475 | 0.518    | -    | 0.855 |
| 129        | 1.330      | 1.000 | 0.000  | 0.145 | -0.855 | 0.145 | 1.000 | 0.475 | 0.518    | -    | 0.855 |
| 130        | 1.340      | 1.000 | 0.000  | 0.145 | -0.855 | 0.145 | 1.000 | 0.475 | 0.518    | -    | 0.855 |
| 131        | 1.350      | 1.000 | 0.000  | 0.145 | -0.855 | 0.145 | 1.000 | 0.475 | 0.518    | -    | 0.855 |
| 132        | 1.360      | 1.000 | 0.000  | 0.145 | -0.855 | 0.145 | 1.000 | 0.475 | 0.518    | -    | 0.855 |
| 133        | 1.370      | 1.000 | 0.000  | 0.145 | -0.855 | 0.145 | 1.000 | 0.475 | 0.518    | -    | 0.855 |
| 134        | 1.380      | 1.000 | 0.000  | 0.129 | -0.871 | 0.129 | 1.000 | 0.471 | 0.509    | -    | 0.871 |
| 135        | 1.390      | 1.000 | 0.000  | 0.129 | -0.871 | 0.129 | 1.000 | 0.471 | 0.509    | -    | 0.871 |
| 136        | 1.400      | 1.000 | 0.000  | 0.129 | -0.871 | 0.129 | 1.000 | 0.471 | 0.509    | -    | 0.871 |
| 137        | 1.410      | 1.000 | 0.000  | 0.129 | -0.871 | 0.129 | 1.000 | 0.471 | 0.509    | -    | 0.871 |
| 138        | 1.420      | 1.000 | 0.000  | 0.129 | -0.871 | 0.129 | 1.000 | 0.471 | 0.509    | -    | 0.871 |
| 139        | 1.430      | 1.000 | 0.000  | 0.113 | -0.887 | 0.113 | 1.000 | 0.466 | 0.500    | -    | 0.887 |
| 140        | 1.440      | 1.000 | 0.000  | 0.081 | -0.919 | 0.081 | 1.000 | 0.457 | 0.482    | -    | 0.919 |
| 141        | 1.450      | 1.000 | 0.000  | 0.081 | -0.919 | 0.081 | 1.000 | 0.457 | 0.482    | -    | 0.919 |
| 142        | 1.460      | 1.000 | 0.000  | 0.065 | -0.935 | 0.065 | 1.000 | 0.453 | 0.473    | -    | 0.935 |
| 143        | 1.470      | 1.000 | 0.000  | 0.065 | -0.935 | 0.065 | 1.000 | 0.453 | 0.473    | -    | 0.935 |
| 144        | 1.480      | 1.000 | 0.000  | 0.065 | -0.935 | 0.065 | 1.000 | 0.453 | 0.473    | -    | 0.935 |
| 145        | 1.490      | 1.000 | 0.000  | 0.065 | -0.935 | 0.065 | 1.000 | 0.453 | 0.473    | -    | 0.935 |
| 146        | 1.500      | 1.000 | 0.000  | 0.048 | -0.952 | 0.048 | 1.000 | 0.449 | 0.464    | -    | 0.952 |
| 147        | 1.510      | 1.000 | 0.000  | 0.032 | -0.968 | 0.032 | 1.000 | 0.444 | 0.455    | -    | 0.968 |
| 148        | 1.520      | 1.000 | 0.000  | 0.032 | -0.968 | 0.032 | 1.000 | 0.444 | 0.455    | -    | 0.968 |
| 149        | 1.530      | 1.000 | 0.000  | 0.077 | -0.923 | 0.077 | 1.000 | 0.444 | 0.469    | -    | 0.923 |
| 150        | 1.540      | 1.000 | 0.000  | 0.032 | -0.968 | 0.032 | 1.000 | 0.444 | 0.455    | -    | 0.968 |
| 151        | 1.550      | 1.000 | 0.000  | 0.032 | -0.968 | 0.032 | 1.000 | 0.444 | 0.455    | -    | 0.968 |
| 152        | 1.560      | 1.000 | 0.000  | 0.032 | -0.968 | 0.032 | 1.000 | 0.444 | 0.455    | -    | 0.968 |
| 153        | 1.570      | 1.000 | 0.000  | 0.032 | -0.968 | 0.032 | 1.000 | 0.444 | 0.455    | -    | 0.968 |
| 154        | 1.580      | 1.000 | 0.000  | 0.032 | -0.968 | 0.032 | 1.000 | 0.444 | 0.455    | -    | 0.968 |
| 155        | 1.590      | 1.000 | 0.000  | 0.032 | -0.968 | 0.032 | 1.000 | 0.444 | 0.455    | -    | 0.968 |

Continued on the next page



**Supplementary Table S4** (*continued*)

| N. Cut-off | OD cut-off | Sp    | 1 - Sp | Se    | Se-Sp  | J     | VPP   | VPN   | Accuracy | LR + | LR -  |
|------------|------------|-------|--------|-------|--------|-------|-------|-------|----------|------|-------|
| 156        | 1.600      | 1.000 | 0.000  | 0.016 | -0.984 | 0.016 | 1.000 | 0.440 | 0.445    | -    | 0.984 |
| 157        | 1.610      | 1.000 | 0.000  | 0.016 | -0.984 | 0.016 | 1.000 | 0.440 | 0.445    | -    | 0.984 |
| 158        | 1.620      | 1.000 | 0.000  | 0.016 | -0.984 | 0.016 | 1.000 | 0.440 | 0.445    | -    | 0.984 |
| 159        | 1.630      | 1.000 | 0.000  | 0.016 | -0.984 | 0.016 | 1.000 | 0.440 | 0.445    | -    | 0.984 |
| 160        | 1.640      | 1.000 | 0.000  | 0.016 | -0.984 | 0.016 | 1.000 | 0.440 | 0.445    | -    | 0.984 |
| 161        | 1.650      | 1.000 | 0.000  | 0.016 | -0.984 | 0.016 | 1.000 | 0.440 | 0.445    | -    | 0.984 |
| 162        | 1.660      | 1.000 | 0.000  | 0.016 | -0.984 | 0.016 | 1.000 | 0.440 | 0.445    | -    | 0.984 |
| 163        | 1.670      | 1.000 | 0.000  | 0.016 | -0.984 | 0.016 | 1.000 | 0.440 | 0.445    | -    | 0.984 |
| 164        | 1.680      | 1.000 | 0.000  | 0.016 | -0.984 | 0.016 | 1.000 | 0.440 | 0.445    | -    | 0.984 |
| 165        | 1.690      | 1.000 | 0.000  | 0.016 | -0.984 | 0.016 | 1.000 | 0.440 | 0.445    | -    | 0.984 |
| 166        | 1.700      | 1.000 | 0.000  | 0.016 | -0.984 | 0.016 | 1.000 | 0.440 | 0.445    | -    | 0.984 |
| 167        | 1.710      | 1.000 | 0.000  | 0.016 | -0.984 | 0.016 | 1.000 | 0.440 | 0.445    | -    | 0.984 |
| 168        | 1.720      | 1.000 | 0.000  | 0.016 | -0.984 | 0.016 | 1.000 | 0.440 | 0.445    | -    | 0.984 |
| 169        | 1.730      | 1.000 | 0.000  | 0.016 | -0.984 | 0.016 | 1.000 | 0.440 | 0.445    | -    | 0.984 |
| 170        | 1.740      | 1.000 | 0.000  | 0.000 | -1.000 | 0.000 | -     | 0.436 | 0.436    | -    | 1.000 |
| 171        | 1.750      | 1.000 | 0.000  | 0.000 | -1.000 | 0.000 | -     | 0.436 | 0.436    | -    | 1.000 |
| 172        | 1.760      | 1.000 | 0.000  | 0.000 | -1.000 | 0.000 | -     | 0.436 | 0.436    | -    | 1.000 |
| 173        | 1.770      | 1.000 | 0.000  | 0.000 | -1.000 | 0.000 | -     | 0.398 | 0.398    | -    | 1.000 |
| 174        | 1.780      | 1.000 | 0.000  | 0.000 | -1.000 | 0.000 | -     | 0.436 | 0.436    | -    | 1.000 |
| 175        | 1.790      | 1.000 | 0.000  | 0.000 | -1.000 | 0.000 | -     | 0.436 | 0.436    | -    | 1.000 |
| 176        | 1.800      | 1.000 | 0.000  | 0.000 | -1.000 | 0.000 | -     | 0.436 | 0.436    | -    | 1.000 |
| 177        | 1.810      | 1.000 | 0.000  | 0.000 | -1.000 | 0.000 | -     | 0.436 | 0.436    | -    | 1.000 |

**Supplementary Table S5. Reproducibility study.** ELISA tests were performed in duplicate, twice a day, for 6 or 14 consecutive days (24 or 56 tests for each sample). PC: positive control; NC: negative control; samples: 1, 2, 3 (negative), 4 (positive). OD: optical density. n.d.: not determined.

| Samples  | Day 1 |       |       |       | Day 2 |       |       |       | Day 3 |       |       |       | Day 4 |       |       |       | Day 5 |       |       |       |
|----------|-------|-------|-------|-------|-------|-------|-------|-------|-------|-------|-------|-------|-------|-------|-------|-------|-------|-------|-------|-------|
|          | OD 1  | OD 2  | OD 3  | OD 4  | OD 1  | OD 2  | OD 3  | OD 4  | OD 1  | OD 2  | OD 3  | OD 4  | OD 1  | OD 2  | OD 3  | OD 4  | OD 1  | OD 2  | OD 3  | OD 4  |
| PC       | 2.689 | 2.666 | 2.671 | 2.677 | 2.639 | 2.657 | 2.661 | 2.654 | 2.626 | 2.635 | 2.677 | 2.654 | 2.675 | 2.673 | 2.643 | 2.639 | 2.645 | 2.658 | 2.665 | 2.671 |
| NC       | 0.045 | 0.042 | 0.041 | 0.041 | 0.043 | 0.042 | 0.044 | 0.043 | 0.043 | 0.043 | 0.045 | 0.043 | 0.043 | 0.042 | 0.041 | 0.041 | 0.043 | 0.043 | 0.044 | 0.049 |
| Sample 1 | 0.058 | 0.058 | 0.056 | 0.057 | 0.054 | 0.056 | 0.054 | 0.055 | 0.053 | 0.055 | 0.060 | 0.060 | 0.059 | 0.055 | 0.052 | 0.052 | 0.055 | 0.053 | 0.059 | 0.058 |
| Sample 2 | 0.052 | 0.053 | 0.051 | 0.050 | 0.054 | 0.051 | 0.053 | 0.051 | 0.053 | 0.050 | 0.053 | 0.053 | 0.055 | 0.052 | 0.049 | 0.052 | 0.057 | 0.051 | 0.057 | 0.054 |
| Sample 3 | 0.073 | 0.072 | 0.078 | 0.073 | 0.078 | 0.074 | 0.073 | 0.072 | 0.072 | 0.072 | 0.073 | 0.072 | 0.088 | 0.075 | 0.075 | 0.073 | 0.077 | 0.082 | 0.094 | 0.084 |
| Sample 4 | 0.759 | 0.796 | 0.799 | 0.697 | 0.628 | 0.768 | 0.694 | 0.668 | 0.653 | 0.671 | 0.797 | 0.807 | 0.687 | 0.634 | 0.567 | 0.747 | 0.667 | 0.649 | 0.851 | 0.785 |

  

| Samples  | Day 6 |       |       |       | Day 7 |       |       |       | Day 8 |       |       |       | Day 9 |       |       |       | Day 10 |       |       |       |
|----------|-------|-------|-------|-------|-------|-------|-------|-------|-------|-------|-------|-------|-------|-------|-------|-------|--------|-------|-------|-------|
|          | OD 1  | OD 2  | OD 3  | OD 4  | OD 1  | OD 2  | OD 3  | OD 4  | OD 1  | OD 2  | OD 3  | OD 4  | OD 1  | OD 2  | OD 3  | OD 4  | OD 1   | OD 2  | OD 3  | OD 4  |
| PC       | 2.674 | 2.668 | 2.676 | 2.666 | 2.639 | 2.641 | 2.648 | 2.654 | 2.642 | 2.654 | 2.677 | 2.674 | 2.679 | 2.675 | 2.652 | 2.654 | 2.649  | 2.661 | 2.667 | 2.662 |
| NC       | 0.044 | 0.043 | 0.042 | 0.045 | n.d   | n.d   | n.d   | n.d   | n.d   | n.d   | n.d   | n.d   | n.d   | n.d   | n.d   | n.d   | n.d    | n.d   | n.d   | n.d   |
| Sample 1 | 0.061 | 0.061 | 0.060 | 0.056 | n.d   | n.d   | n.d   | n.d   | n.d   | n.d   | n.d   | n.d   | n.d   | n.d   | n.d   | n.d   | n.d    | n.d   | n.d   | n.d   |
| Sample 2 | 0.054 | 0.054 | 0.052 | 0.052 | n.d   | n.d   | n.d   | n.d   | n.d   | n.d   | n.d   | n.d   | n.d   | n.d   | n.d   | n.d   | n.d    | n.d   | n.d   | n.d   |
| Sample 3 | 0.073 | 0.074 | 0.079 | 0.075 | n.d   | n.d   | n.d   | n.d   | n.d   | n.d   | n.d   | n.d   | n.d   | n.d   | n.d   | n.d   | n.d    | n.d   | n.d   | n.d   |
| Sample 4 | 0.676 | 0.675 | 0.711 | 0.663 | n.d   | n.d   | n.d   | n.d   | n.d   | n.d   | n.d   | n.d   | n.d   | n.d   | n.d   | n.d   | n.d    | n.d   | n.d   | n.d   |

  

| Samples  | Day 11 |       |       |       | Day 12 |       |       |       | Day 13 |       |       |       | Day 14 |       |       |       |
|----------|--------|-------|-------|-------|--------|-------|-------|-------|--------|-------|-------|-------|--------|-------|-------|-------|
|          | OD 1   | OD 2  | OD 3  | OD 4  | OD 1   | OD 2  | OD 3  | OD 4  | OD 1   | OD 2  | OD 3  | OD 4  | OD 1   | OD 2  | OD 3  | OD 4  |
| PC       | 2.664  | 2.660 | 2.676 | 2.671 | 2.678  | 2.673 | 2.652 | 2.657 | 2.675  | 2.670 | 2.665 | 2.669 | 2.672  | 2.679 | 2.669 | 2.672 |
| NC       | n.d    | n.d   | n.d   | n.d   | n.d    | n.d   | n.d   | n.d   | n.d    | n.d   | n.d   | n.d   | n.d    | n.d   | n.d   | n.d   |
| Sample 1 | n.d    | n.d   | n.d   | n.d   | n.d    | n.d   | n.d   | n.d   | n.d    | n.d   | n.d   | n.d   | n.d    | n.d   | n.d   | n.d   |
| Sample 2 | n.d    | n.d   | n.d   | n.d   | n.d    | n.d   | n.d   | n.d   | n.d    | n.d   | n.d   | n.d   | n.d    | n.d   | n.d   | n.d   |
| Sample 3 | n.d    | n.d   | n.d   | n.d   | n.d    | n.d   | n.d   | n.d   | n.d    | n.d   | n.d   | n.d   | n.d    | n.d   | n.d   | n.d   |
| Sample 4 | n.d    | n.d   | n.d   | n.d   | n.d    | n.d   | n.d   | n.d   | n.d    | n.d   | n.d   | n.d   | n.d    | n.d   | n.d   | n.d   |

**Supplementary Table S6. Intra- and inter-assay coefficient of variation of FCoVCHECK Ab ELISA.** PC: positive control; NC: negative control; samples: 1, 2, 3 (negative), 4 (positive). %CV: coefficient of variation (%). MIN: minimum %CV; MAX: maximum %CV; n: number of assays; n.d.: not determined.

| Day of analysis | N. assays | Intra-assay %CV |              |              |              |               |               | Inter-assay %CV |              |              |              |              |               |
|-----------------|-----------|-----------------|--------------|--------------|--------------|---------------|---------------|-----------------|--------------|--------------|--------------|--------------|---------------|
|                 |           | PC              | NC           | Sample 1     | Sample 2     | Sample 3      | Sample 4      | PC              | NC           | Sample 1     | Sample 2     | Sample 3     | Sample 4      |
| Day 1           | 1         | 0.607           | 4.877        | 0.000        | 1.347        | 0.975         | 3.365         | 0.383           | 2.438        | 0.626        | 1.374        | 2.829        | 6.504         |
|                 | 2         | 0.159           | 0.000        | 1.252        | 1.400        | 4.683         | 9.642         |                 |              |              |              |              |               |
| Day 2           | 3         | 0.481           | 1.664        | 2.571        | 4.041        | 3.722         | 14.183        | 0.333           | 1.645        | 1.934        | 3.380        | 2.348        | 8.441         |
|                 | 4         | 0.186           | 1.626        | 1.297        | 2.720        | 0.975         | 2.700         |                 |              |              |              |              |               |
| Day 3           | 5         | 0.242           | 0.000        | 2.619        | 4.119        | 0.000         | 1.923         | 0.426           | 1.607        | 1.309        | 2.060        | 0.488        | 1.402         |
|                 | 6         | 0.610           | 3.214        | 0.000        | 0.000        | 0.975         | 0.882         |                 |              |              |              |              |               |
| Day 4           | 7         | 0.053           | 1.664        | 4.962        | 3.965        | 11.279        | 5.674         | 0.080           | 0.832        | 2.481        | 4.083        | 6.595        | 12.523        |
|                 | 8         | 0.107           | 0.000        | 0.000        | 4.201        | 1.911         | 19.373        |                 |              |              |              |              |               |
| Day 5           | 9         | 0.347           | 0.000        | 2.619        | 7.857        | 4.447         | 1.934         | 0.253           | 3.802        | 1.914        | 5.839        | 6.196        | 3.820         |
|                 | 10        | 0.159           | 7.603        | 1.209        | 3.822        | 7.945         | 5.705         |                 |              |              |              |              |               |
| Day 6           | 11        | 0.159           | 1.626        | 0.000        | 0.000        | 0.962         | 0.105         | 0.212           | 3.251        | 2.438        | 0.000        | 2.318        | 2.523         |
|                 | 12        | 0.265           | 4.877        | 4.877        | 0.000        | 3.673         | 4.940         |                 |              |              |              |              |               |
| Day 7           | 13        | 0.054           | n.d.         | n.d.         | n.d.         | n.d.          | n.d.          | 0.107           | n.d.         | n.d.         | n.d.         | n.d.         | n.d.          |
|                 | 14        | 0.160           | n.d.         | n.d.         | n.d.         | n.d.          | n.d.          |                 |              |              |              |              |               |
| Day 8           | 15        | 0.320           | n.d.         | n.d.         | n.d.         | n.d.          | n.d.          | 0.200           | n.d.         | n.d.         | n.d.         | n.d.         | n.d.          |
|                 | 16        | 0.079           | n.d.         | n.d.         | n.d.         | n.d.          | n.d.          |                 |              |              |              |              |               |
| Day 9           | 17        | 0.106           | n.d.         | n.d.         | n.d.         | n.d.          | n.d.          | 0.079           | n.d.         | n.d.         | n.d.         | n.d.         | n.d.          |
|                 | 18        | 0.053           | n.d.         | n.d.         | n.d.         | n.d.          | n.d.          |                 |              |              |              |              |               |
| Day 10          | 19        | 0.320           | n.d.         | n.d.         | n.d.         | n.d.          | n.d.          | 0.226           | n.d.         | n.d.         | n.d.         | n.d.         | n.d.          |
|                 | 20        | 0.133           | n.d.         | n.d.         | n.d.         | n.d.          | n.d.          |                 |              |              |              |              |               |
| Day 11          | 21        | 0.106           | n.d.         | n.d.         | n.d.         | n.d.          | n.d.          | 0.119           | n.d.         | n.d.         | n.d.         | n.d.         | n.d.          |
|                 | 22        | 0.132           | n.d.         | n.d.         | n.d.         | n.d.          | n.d.          |                 |              |              |              |              |               |
| Day 12          | 23        | 0.132           | n.d.         | n.d.         | n.d.         | n.d.          | n.d.          | 0.133           | n.d.         | n.d.         | n.d.         | n.d.         | n.d.          |
|                 | 24        | 0.133           | n.d.         | n.d.         | n.d.         | n.d.          | n.d.          |                 |              |              |              |              |               |
| Day 13          | 25        | 0.132           | n.d.         | n.d.         | n.d.         | n.d.          | n.d.          | 0.119           | n.d.         | n.d.         | n.d.         | n.d.         | n.d.          |
|                 | 26        | 0.106           | n.d.         | n.d.         | n.d.         | n.d.          | n.d.          |                 |              |              |              |              |               |
| Day 14          | 27        | 0.185           | n.d.         | n.d.         | n.d.         | n.d.          | n.d.          | 0.132           | n.d.         | n.d.         | n.d.         | n.d.         | n.d.          |
|                 | 28        | 0.079           | n.d.         | n.d.         | n.d.         | n.d.          | n.d.          |                 |              |              |              |              |               |
| <b>MIN</b>      |           | <b>0.053</b>    | <b>0.000</b> | <b>0.000</b> | <b>0.000</b> | <b>0.000</b>  | <b>0.105</b>  | <b>0.079</b>    | <b>0.832</b> | <b>0.626</b> | <b>0.000</b> | <b>0.488</b> | <b>1.402</b>  |
| <b>MAX</b>      |           | <b>0.610</b>    | <b>7.603</b> | <b>4.962</b> | <b>7.857</b> | <b>11.279</b> | <b>19.373</b> | <b>0.426</b>    | <b>3.802</b> | <b>2.481</b> | <b>5.839</b> | <b>6.595</b> | <b>12.523</b> |

**Supplementary Table S7. Comparison results of FCoV CHECK Ab ELISA, ImmunoComb and INgezim Corona Felino ELISA.** Number of samples analysed: 110. All discordant results are highlighted in bold, while those ones only with ImmunoComb are marked with an asterisk. CombScale scores: S0 and S1 (negative); S2 (weak positive or borderline, FIP improbable); S3 and S4 (positive, FIP possible); ≥ S5 (strong positive, high probability of FIP). OD: optical density. POS: positive; NEG: negative. GSD: Gold Standard Diagnostics.

| N. sample | IFAT | FCoV CHECK Ab ELISA (Agrolabo) |          | INgezim Corona Felino (GSD) |         | ImmunoComb (Biogal) |
|-----------|------|--------------------------------|----------|-----------------------------|---------|---------------------|
|           |      | OD                             | Results  | OD                          | Results | CombScale           |
| 1         | NEG  | 0.105                          | NEG      | <b>0.439</b>                | POS     | S2                  |
| 2         | NEG  | 0.157                          | NEG      | <b>0.580</b>                | POS     | S2                  |
| 3         | POS  | 0.694                          | POS      | 0.760                       | POS     | S5                  |
| 4         | POS  | 1.434                          | POS      | 1.911                       | POS     | S6                  |
| 5         | NEG  | 0.262                          | NEG      | <b>0.352</b>                | POS     | S1                  |
| 6         | NEG  | 0.117                          | NEG      | <b>0.502</b>                | POS     | S2                  |
| 7         | NEG  | 0.141                          | NEG      | <b>0.463</b>                | POS     | S2                  |
| 8         | POS  | 0.865                          | POS      | 1.135                       | POS     | S3                  |
| 9         | POS  | 0.371                          | POS      | 0.450                       | POS     | S3                  |
| 10        | NEG  | 0.098                          | NEG      | <b>0.320</b>                | POS     | S2                  |
| 11        | POS  | 0.551                          | POS      | 0.485                       | POS     | S3                  |
| 12        | NEG  | 0.086                          | NEG      | 0.297                       | NEG     | S2                  |
| 13        | POS  | 0.308                          | POS      | 0.475                       | POS     | S3                  |
| 14        | POS  | 0.735                          | POS      | 0.640                       | POS     | S3                  |
| 15*       | NEG  | 0.068                          | NEG      | 0.234                       | NEG     | <b>S4</b>           |
| 16        | POS  | 0.494                          | POS      | 0.443                       | POS     | S3                  |
| 17        | POS  | 0.591                          | POS      | 0.712                       | POS     | S4                  |
| 18        | POS  | 0.385                          | POS      | 0.437                       | POS     | S3                  |
| 19        | POS  | 0.662                          | POS      | 0.864                       | POS     | S5                  |
| 20        | POS  | 0.447                          | POS      | 0.489                       | POS     | S4                  |
| 21        | NEG  | 0.189                          | NEG      | <b>0.256</b>                | POS     | S1                  |
| 22        | POS  | 0.567                          | POS      | 0.720                       | POS     | S3                  |
| 23*       | NEG  | 0.289                          | DOUBTFUL | <b>0.519</b>                | POS     | <b>S3</b>           |
| 24        | POS  | 1.455                          | POS      | 1.625                       | POS     | S5                  |
| 25        | NEG  | 0.088                          | NEG      | <b>0.199</b>                | POS     | S2                  |
| 26        | POS  | 0.316                          | POS      | 0.746                       | POS     | S5                  |
| 27        | POS  | 1.599                          | POS      | 1.651                       | POS     | S6                  |
| 28        | NEG  | 0.253                          | NEG      | <b>0.201</b>                | POS     | S2                  |
| 29        | POS  | 1.116                          | POS      | 0.694                       | POS     | S5                  |
| 30        | NEG  | 0.120                          | NEG      | <b>0.287</b>                | POS     | S0                  |
| 31        | POS  | 0.660                          | POS      | 1.093                       | POS     | S5                  |
| 32        | POS  | 0.309                          | POS      | 1.145                       | POS     | S5                  |
| 33*       | NEG  | 0.145                          | NEG      | <b>0.480</b>                | POS     | <b>S5</b>           |
| 34        | NEG  | 0.215                          | NEG      | <b>0.234</b>                | POS     | S2                  |
| 35        | POS  | 0.768                          | POS      | 0.488                       | POS     | S4                  |
| 36        | POS  | 0.416                          | POS      | 0.997                       | POS     | S5                  |
| 37        | POS  | 0.085                          | NEG      | <b>0.232</b>                | POS     | S2                  |
| 38        | POS  | 1.507                          | POS      | 1.822                       | POS     | S6                  |
| 39*       | NEG  | 0.066                          | NEG      | <b>0.442</b>                | POS     | <b>S4</b>           |
| 40        | POS  | 0.876                          | POS      | 0.839                       | POS     | S3                  |
| 41        | POS  | 0.311                          | POS      | 0.354                       | POS     | S3                  |
| 42        | POS  | 0.349                          | POS      | 0.892                       | POS     | S5                  |
| 43        | POS  | 0.363                          | POS      | 0.387                       | POS     | S3                  |
| 44        | NEG  | 0.205                          | NEG      | <b>0.428</b>                | POS     | S2                  |
| 45        | POS  | 0.318                          | POS      | 0.538                       | POS     | S4                  |
| 46*       | POS  | 0.088                          | NEG      | <b>0.885</b>                | POS     | <b>S4</b>           |
| 47        | POS  | 1.421                          | POS      | 0.984                       | POS     | S6                  |
| 48        | POS  | 0.305                          | POS      | 0.323                       | POS     | S3                  |
| 49        | POS  | 1.124                          | POS      | 0.826                       | POS     | S5                  |
| 50        | POS  | 1.095                          | POS      | 0.944                       | POS     | S5                  |

*Continued on the next page*

Supplementary Table S7 (continued)

| N. sample  | IFAT       | FCoVCHECK Ab ELISA (Agrolabo) |         | INgezim Corona Felino (GSD) |            | ImmunoComb (Biogal) |
|------------|------------|-------------------------------|---------|-----------------------------|------------|---------------------|
|            |            | OD                            | Results | OD                          | Results    | CombScale           |
| 51         | POS        | 1.011                         | POS     | 0.823                       | POS        | S5                  |
| 52         | POS        | 0.388                         | POS     | 0.344                       | POS        | S3                  |
| 53         | POS        | 1.195                         | POS     | 1.359                       | POS        | S5                  |
| <b>54*</b> | <b>NEG</b> | 0.108                         | NEG     | <b>0.453</b>                | <b>POS</b> | <b>S5</b>           |
| 55         | POS        | 0.435                         | POS     | 0.406                       | POS        | S3                  |
| 56         | POS        | 0.549                         | POS     | 0.658                       | POS        | S4                  |
| 57         | POS        | 0.625                         | POS     | 0.908                       | POS        | S5                  |
| 58         | POS        | 0.519                         | POS     | 0.933                       | POS        | S3                  |
| 59         | POS        | 0.650                         | POS     | 0.467                       | POS        | S3                  |
| 60         | POS        | 0.313                         | POS     | 0.461                       | POS        | S3                  |
| 61         | POS        | 1.376                         | POS     | 1.526                       | POS        | S5                  |
| 62         | POS        | 0.883                         | POS     | 0.739                       | POS        | S5                  |
| <b>63*</b> | <b>NEG</b> | 0.083                         | NEG     | <b>0.426</b>                | <b>POS</b> | <b>S4</b>           |
| 64         | NEG        | 0.089                         | NEG     | 0.274                       | NEG        | S1                  |
| 65         | POS        | 0.337                         | POS     | 0.442                       | POS        | S4                  |
| 66         | POS        | 0.335                         | POS     | 0.596                       | POS        | S3                  |
| 67         | POS        | 0.808                         | POS     | 1.171                       | POS        | S5                  |
| 68         | POS        | 0.323                         | POS     | 0.446                       | POS        | S3                  |
| 69         | POS        | 0.995                         | POS     | 1.245                       | POS        | S5                  |
| 70         | POS        | 1.032                         | POS     | 1.281                       | POS        | S5                  |
| 71         | POS        | 0.727                         | POS     | 1.391                       | POS        | S5                  |
| 72         | POS        | 1.497                         | POS     | 1.628                       | POS        | S5                  |
| 73         | POS        | 1.064                         | POS     | 1.538                       | POS        | S5                  |
| 74         | POS        | 0.575                         | POS     | 0.754                       | POS        | S3                  |
| 75         | NEG        | 0.105                         | NEG     | 0.221                       | NEG        | S2                  |
| 76         | NEG        | 0.129                         | NEG     | 0.169                       | NEG        | S2                  |
| 77         | NEG        | 0.079                         | NEG     | 0.065                       | NEG        | S0                  |
| 78         | NEG        | 0.097                         | NEG     | 0.105                       | NEG        | S1                  |
| 79         | NEG        | 0.082                         | NEG     | 0.147                       | NEG        | S2                  |
| 80         | NEG        | 0.070                         | NEG     | 0.079                       | NEG        | S0                  |
| 81         | NEG        | 0.061                         | NEG     | 0.062                       | NEG        | S0                  |
| 82         | NEG        | 0.052                         | NEG     | 0.050                       | NEG        | S0                  |
| 83         | NEG        | 0.237                         | NEG     | 0.226                       | NEG        | S1                  |
| 84         | NEG        | 0.053                         | NEG     | 0.055                       | NEG        | S0                  |
| 85         | NEG        | 0.096                         | NEG     | 0.098                       | NEG        | S0                  |
| 86         | NEG        | 0.066                         | NEG     | 0.088                       | NEG        | S0                  |
| 87         | NEG        | 0.063                         | NEG     | 0.088                       | NEG        | S0                  |
| 88         | NEG        | 0.062                         | NEG     | 0.160                       | NEG        | S2                  |
| 89         | NEG        | 0.067                         | NEG     | 0.103                       | NEG        | S0                  |
| 90         | NEG        | 0.123                         | NEG     | 0.155                       | NEG        | S1                  |
| 91         | NEG        | 0.051                         | NEG     | 0.081                       | NEG        | S0                  |
| 92         | NEG        | 0.081                         | NEG     | 0.156                       | NEG        | S2                  |
| 93         | NEG        | 0.063                         | NEG     | 0.120                       | NEG        | S0                  |
| 94         | NEG        | 0.083                         | NEG     | 0.182                       | NEG        | S2                  |
| 95         | NEG        | 0.090                         | NEG     | 0.121                       | NEG        | S2                  |
| 96         | NEG        | 0.180                         | NEG     | 0.170                       | NEG        | S2                  |
| 97         | NEG        | 0.067                         | NEG     | 0.093                       | NEG        | S0                  |
| 98         | POS        | 0.110                         | NEG     | 0.147                       | NEG        | S1                  |
| 99         | NEG        | 0.062                         | NEG     | 0.125                       | NEG        | S1                  |
| 100        | NEG        | 0.241                         | NEG     | 0.201                       | NEG        | S1                  |
| 101        | NEG        | 0.070                         | NEG     | 0.112                       | NEG        | S0                  |
| 102        | NEG        | 0.075                         | NEG     | 0.101                       | NEG        | S0                  |
| 103        | POS        | 0.070                         | NEG     | 0.202                       | NEG        | S0                  |

Continued on the next page

**Supplementary Table S7** (*continued*)

| N. sample | IFAT | FCoVCHECK Ab ELISA (Agrolabo) |         | INgezim Corona Felino (GSD) |         | ImmunoComb (Biogal) |
|-----------|------|-------------------------------|---------|-----------------------------|---------|---------------------|
|           |      | OD                            | Results | OD                          | Results | CombScale           |
| 104       | NEG  | 0.072                         | NEG     | 0.100                       | NEG     | S0                  |
| 105       | POS  | 1.236                         | POS     | 1.845                       | POS     | S5                  |
| 106       | POS  | 1.112                         | POS     | 1.472                       | POS     | S5                  |
| 107       | POS  | 1.074                         | POS     | 1.433                       | POS     | S5                  |
| 108       | POS  | 0.304                         | POS     | 0.234                       | POS     | S3                  |
| 109       | POS  | 1.431                         | POS     | 1.081                       | POS     | S6                  |
| 110       | POS  | 1.733                         | POS     | 1.814                       | POS     | S6                  |

**Supplementary Table S8. Titration assay performed by FCoV CHECK Ab ELISA and INgezim Corona Felino ELISA.** Number of positive samples tested: 21. Samples were tested at dilution from 1:200 to 1:12,800. Fields in bold indicate the OD value corresponding to the antibody titer. OD cut-off values of INgezim Corona Felino ELISA and FCoV CHECK Ab ELISA were 0.308 and 0.255, respectively. n.d: not determined.

| Samples   | INgezim Corona Felino ELISA (Gold Standard Diagnostics) |              |              |              | FCoV CHECK Ab ELISA (Agrolabo) |              |              |          |
|-----------|---------------------------------------------------------|--------------|--------------|--------------|--------------------------------|--------------|--------------|----------|
|           | 1:200                                                   | 1:3,200      | 1:6,400      | 1:12,800     | 1:200                          | 1:3,200      | 1:6,400      | 1:12,800 |
| Sample 1  | <b>0.760</b>                                            | 0.119        | 0.077        | 0.059        | <b>0.592</b>                   | 0.113        | 0.077        | 0.068    |
| Sample 2  | 1.911                                                   | <b>0.371</b> | 0.218        | 0.121        | 1.324                          | <b>0.310</b> | 0.202        | 0.145    |
| Sample 3  | <b>0.640</b>                                            | 0.125        | 0.085        | 0.064        | <b>0.721</b>                   | 0.146        | 0.094        | 0.081    |
| Sample 4  | <b>0.443</b>                                            | 0.075        | n.d.         | n.d.         | <b>0.413</b>                   | 0.073        | 0.062        | 0.056    |
| Sample 5  | <b>0.712</b>                                            | 0.097        | n.d.         | n.d.         | <b>0.362</b>                   | 0.070        | 0.058        | 0.058    |
| Sample 6  | <b>0.864</b>                                            | 0.167        | n.d.         | n.d.         | <b>0.562</b>                   | 0.144        | 0.101        | 0.078    |
| Sample 7  | <b>0.720</b>                                            | 0.132        | n.d.         | n.d.         | <b>0.465</b>                   | 0.094        | 0.071        | 0.065    |
| Sample 8  | 1.885                                                   | 0.787        | 0.499        | <b>0.318</b> | 1.452                          | 0.446        | <b>0.287</b> | 0.209    |
| Sample 9  | 1.863                                                   | 0.795        | <b>0.469</b> | 0.300        | 1.712                          | 0.565        | <b>0.357</b> | 0.214    |
| Sample 10 | 1.988                                                   | 0.762        | <b>0.459</b> | 0.304        | 1.769                          | 0.518        | <b>0.365</b> | 0.230    |
| Sample 11 | <b>1.341</b>                                            | 0.277        | 0.168        | 0.101        | <b>1.176</b>                   | 0.254        | 0.165        | 0.114    |
| Sample 12 | <b>0.406</b>                                            | 0.060        | n.d.         | n.d.         | <b>0.269</b>                   | 0.066        | 0.052        | 0.050    |
| Sample 13 | 1.599                                                   | <b>0.358</b> | 0.210        | 0.134        | 1.500                          | 0.429        | <b>0.274</b> | 0.167    |
| Sample 14 | <b>1.245</b>                                            | 0.199        | n.d.         | n.d.         | <b>0.811</b>                   | 0.136        | 0.098        | 0.076    |
| Sample 15 | 1.355                                                   | 0.501        | <b>0.321</b> | 0.218        | 1.216                          | 0.442        | <b>0.273</b> | 0.199    |
| Sample 16 | 1.403                                                   | <b>0.411</b> | 0.248        | 0.166        | <b>0.723</b>                   | 0.227        | 0.154        | 0.111    |
| Sample 17 | 1.863                                                   | 0.405        | <b>0.359</b> | 0.151        | 1.781                          | 0.535        | <b>0.332</b> | 0.248    |
| Sample 18 | 1.586                                                   | <b>0.416</b> | 0.252        | 0.153        | 1.123                          | <b>0.311</b> | 0.188        | 0.133    |
| Sample 19 | 2.159                                                   | 0.648        | <b>0.401</b> | 0.236        | 1.391                          | <b>0.344</b> | 0.222        | 0.138    |
| Sample 20 | 1.769                                                   | 0.551        | <b>0.365</b> | 0.213        | 1.183                          | 0.415        | <b>0.283</b> | 0.194    |
| Sample 21 | 1.458                                                   | <b>0.400</b> | 0.265        | 0.173        | 1.298                          | <b>0.309</b> | 0.197        | 0.136    |

**Supplementary Table S9. Accelerated stability study.** At each time of analysis (T<sub>0</sub>– T<sub>6</sub>) samples were tested in duplicate, then the mean OD values and percentage remaining activities (%RA) were calculated. PC: positive control; NC: negative control; samples: 1, 2,3 (negative), 4 (positive).

| Samples  | T <sub>0</sub> |       |       |        | T <sub>1</sub> |       |       |        | T <sub>2</sub> |       |       |        | T <sub>3</sub> |       |       |        |
|----------|----------------|-------|-------|--------|----------------|-------|-------|--------|----------------|-------|-------|--------|----------------|-------|-------|--------|
|          | OD 1           | OD 2  | Mean  | %RA    | OD 1           | OD 2  | Mean  | %RA    | OD 1           | OD 2  | Mean  | %RA    | OD 1           | OD 2  | Mean  | %RA    |
| PC       | 2.877          | 2.856 | 2.867 | 100.00 | 2.713          | 2.777 | 2.745 | 95.76  | 2.626          | 2.624 | 2.625 | 91.58  | 2.622          | 2.639 | 2.631 | 91.77  |
| NC       | 0.042          | 0.044 | 0.043 | 100.00 | 0.048          | 0.045 | 0.047 | 108.14 | 0.047          | 0.049 | 0.048 | 111.63 | 0.049          | 0.046 | 0.048 | 110.47 |
| Sample 1 | 0.048          | 0.048 | 0.048 | 100.00 | 0.049          | 0.049 | 0.049 | 102.08 | 0.050          | 0.052 | 0.051 | 106.25 | 0.051          | 0.048 | 0.050 | 103.13 |
| Sample 2 | 0.056          | 0.057 | 0.057 | 100.00 | 0.058          | 0.059 | 0.059 | 103.54 | 0.061          | 0.065 | 0.063 | 111.50 | 0.059          | 0.059 | 0.059 | 104.42 |
| Sample 3 | 0.173          | 0.175 | 0.174 | 100.00 | 0.177          | 0.166 | 0.172 | 98.56  | 0.173          | 0.172 | 0.173 | 99.14  | 0.151          | 0.148 | 0.150 | 85.92  |
| Sample 4 | 0.526          | 0.513 | 0.520 | 100.00 | 0.533          | 0.544 | 0.539 | 103.66 | 0.591          | 0.509 | 0.550 | 105.87 | 0.428          | 0.492 | 0.460 | 88.55  |

| Samples  | T <sub>4</sub> |       |       |        | T <sub>5</sub> |       |       |        | T <sub>6</sub> |       |       |        |
|----------|----------------|-------|-------|--------|----------------|-------|-------|--------|----------------|-------|-------|--------|
|          | OD 1           | OD 2  | Mean  | %RA    | OD 1           | OD 2  | Mean  | %RA    | OD 1           | OD 2  | Mean  | %RA    |
| PC       | 2.667          | 2.657 | 2.662 | 92.87  | 2.601          | 2.611 | 2.606 | 90.91  | 2.547          | 2.556 | 2.552 | 89.01  |
| NC       | 0.047          | 0.048 | 0.048 | 110.47 | 0.046          | 0.048 | 0.047 | 109.30 | 0.045          | 0.044 | 0.045 | 103.49 |
| Sample 1 | 0.051          | 0.055 | 0.053 | 110.42 | 0.047          | 0.049 | 0.048 | 100.00 | 0.047          | 0.050 | 0.049 | 101.04 |
| Sample 2 | 0.060          | 0.061 | 0.061 | 107.08 | 0.055          | 0.060 | 0.058 | 101.77 | 0.055          | 0.056 | 0.056 | 98.23  |
| Sample 3 | 0.161          | 0.153 | 0.157 | 90.23  | 0.127          | 0.146 | 0.137 | 78.45  | 0.150          | 0.146 | 0.148 | 85.06  |
| Sample 4 | 0.453          | 0.470 | 0.462 | 88.84  | 0.424          | 0.439 | 0.432 | 83.06  | 0.447          | 0.440 | 0.444 | 85.37  |



**Supplementary Table S10. Real-time stability study.** At each time of analysis (T<sub>0</sub> – T<sub>12</sub>) samples were tested in duplicate, then the mean OD values and percentage remaining activities (%RA) were calculated. PC: positive control; NC: negative control. Samples: 1, 2 (negative); 3, 4, 5 (positive).

| Samples  | T <sub>0</sub> |       |       |        | T <sub>1</sub> |       |       |        | T <sub>2</sub> |       |       |        | T <sub>3</sub> |       |       |        | T <sub>4</sub> |       |       |        |
|----------|----------------|-------|-------|--------|----------------|-------|-------|--------|----------------|-------|-------|--------|----------------|-------|-------|--------|----------------|-------|-------|--------|
|          | OD 1           | OD 2  | Mean  | %RA    | OD 1           | OD 2  | Mean  | %RA    | OD 1           | OD 2  | Mean  | %RA    | OD 1           | OD 2  | Mean  | %RA    | OD 1           | OD 2  | Mean  | %RA    |
| PC       | 2.877          | 2.856 | 2.867 | 100.00 | 2.913          | 2.929 | 2.921 | 101.90 | 2.859          | 2.858 | 2.859 | 99.72  | 2.854          | 2.855 | 2.855 | 99.58  | 2.867          | 2.857 | 2.862 | 99.84  |
| NC       | 0.049          | 0.047 | 0.048 | 100.00 | 0.047          | 0.046 | 0.047 | 96.88  | 0.050          | 0.049 | 0.050 | 103.13 | 0.041          | 0.049 | 0.045 | 93.75  | 0.048          | 0.048 | 0.048 | 100.00 |
| Sample 1 | 0.051          | 0.059 | 0.055 | 100.00 | 0.057          | 0.053 | 0.055 | 100.00 | 0.051          | 0.056 | 0.054 | 97.27  | 0.053          | 0.049 | 0.051 | 92.73  | 0.059          | 0.053 | 0.056 | 101.82 |
| Sample 2 | 0.062          | 0.065 | 0.064 | 100.00 | 0.064          | 0.070 | 0.067 | 105.51 | 0.062          | 0.069 | 0.066 | 103.15 | 0.055          | 0.060 | 0.058 | 90.55  | 0.063          | 0.065 | 0.064 | 100.79 |
| Sample 3 | 0.535          | 0.551 | 0.543 | 100.00 | 0.509          | 0.514 | 0.512 | 94.20  | 0.506          | 0.507 | 0.507 | 93.28  | 0.548          | 0.563 | 0.556 | 102.30 | 0.566          | 0.569 | 0.568 | 104.51 |
| Sample 4 | 0.830          | 0.828 | 0.829 | 100.00 | 0.802          | 0.862 | 0.832 | 100.36 | 0.794          | 0.791 | 0.793 | 95.60  | 0.769          | 0.795 | 0.782 | 94.33  | 0.814          | 0.807 | 0.811 | 97.77  |
| Sample 5 | 1.222          | 1.225 | 1.224 | 100.00 | 1.193          | 1.197 | 1.195 | 97.67  | 1.183          | 1.187 | 1.185 | 96.85  | 1.154          | 1.158 | 1.156 | 94.48  | 1.164          | 1.146 | 1.155 | 94.40  |

| Samples  | T <sub>5</sub> |       |       |        | T <sub>6</sub> |       |       |        | T <sub>7</sub> (3 months) |       |       |        | T <sub>8</sub> (6 months) |       |       |        | T <sub>9</sub> (9 months) |       |       |        |
|----------|----------------|-------|-------|--------|----------------|-------|-------|--------|---------------------------|-------|-------|--------|---------------------------|-------|-------|--------|---------------------------|-------|-------|--------|
|          | OD 1           | OD 2  | Mean  | %RA    | OD 1           | OD 2  | Mean  | %RA    | OD 1                      | OD 2  | Mean  | %RA    | OD 1                      | OD 2  | Mean  | %RA    | OD 1                      | OD 2  | Mean  | %RA    |
| PC       | 2.905          | 2.901 | 2.903 | 101.27 | 2.880          | 2.884 | 2.882 | 100.54 | 2.853                     | 2.869 | 2.861 | 99.81  | 2.789                     | 2.791 | 2.790 | 97.33  | 2.711                     | 2.783 | 2.747 | 95.83  |
| NC       | 0.050          | 0.051 | 0.051 | 105.21 | 0.049          | 0.048 | 0.049 | 101.04 | 0.048                     | 0.046 | 0.047 | 97.92  | 0.045                     | 0.047 | 0.046 | 95.83  | 0.050                     | 0.050 | 0.050 | 104.17 |
| Sample 1 | 0.061          | 0.054 | 0.058 | 104.55 | 0.050          | 0.053 | 0.052 | 93.64  | 0.057                     | 0.054 | 0.056 | 100.91 | 0.053                     | 0.057 | 0.055 | 100.00 | 0.051                     | 0.054 | 0.053 | 95.46  |
| Sample 2 | 0.068          | 0.059 | 0.064 | 100.00 | 0.061          | 0.058 | 0.060 | 93.70  | 0.065                     | 0.063 | 0.064 | 100.79 | 0.062                     | 0.064 | 0.063 | 99.21  | 0.058                     | 0.069 | 0.064 | 100.00 |
| Sample 3 | 0.564          | 0.561 | 0.563 | 103.59 | 0.543          | 0.539 | 0.541 | 99.63  | 0.540                     | 0.538 | 0.539 | 99.26  | 0.539                     | 0.531 | 0.535 | 98.53  | 0.486                     | 0.481 | 0.484 | 89.04  |
| Sample 4 | 0.793          | 0.799 | 0.796 | 96.02  | 0.772          | 0.726 | 0.749 | 90.35  | 0.828                     | 0.799 | 0.814 | 98.13  | 0.799                     | 0.810 | 0.805 | 97.05  | 0.708                     | 0.682 | 0.695 | 83.84  |
| Sample 5 | 1.169          | 1.177 | 1.173 | 95.87  | 1.174          | 1.167 | 1.171 | 95.67  | 1.224                     | 1.199 | 1.212 | 99.02  | 1.210                     | 1.211 | 1.211 | 98.94  | 1.022                     | 1.051 | 1.037 | 84.72  |

| Samples  | T <sub>10</sub> (12 months) |       |       |       | T <sub>11</sub> (15 months) |       |       |       | T <sub>12</sub> (18 months) |       |       |       |
|----------|-----------------------------|-------|-------|-------|-----------------------------|-------|-------|-------|-----------------------------|-------|-------|-------|
|          | OD 1                        | OD 2  | Mean  | %RA   | OD 1                        | OD 2  | Mean  | %RA   | OD 1                        | OD 2  | Mean  | %RA   |
| PC       | 2.517                       | 2.544 | 2.531 | 88.28 | 2.501                       | 2.511 | 2.506 | 87.42 | 2.389                       | 2.391 | 2.390 | 83.38 |
| NC       | 0.048                       | 0.047 | 0.048 | 98.96 | 0.045                       | 0.046 | 0.046 | 94.79 | 0.044                       | 0.044 | 0.044 | 91.67 |
| Sample 1 | 0.055                       | 0.050 | 0.053 | 95.46 | 0.049                       | 0.047 | 0.048 | 87.27 | 0.045                       | 0.046 | 0.046 | 82.73 |
| Sample 2 | 0.058                       | 0.056 | 0.057 | 89.76 | 0.051                       | 0.053 | 0.052 | 81.89 | 0.052                       | 0.051 | 0.052 | 81.10 |
| Sample 3 | 0.403                       | 0.414 | 0.409 | 75.23 | 0.400                       | 0.402 | 0.401 | 73.85 | 0.389                       | 0.391 | 0.390 | 71.82 |
| Sample 4 | 0.645                       | 0.654 | 0.650 | 78.35 | 0.621                       | 0.624 | 0.623 | 75.09 | 0.602                       | 0.605 | 0.604 | 72.80 |
| Sample 5 | 0.971                       | 0.978 | 0.975 | 79.65 | 0.968                       | 0.965 | 0.967 | 79.00 | 0.884                       | 0.887 | 0.886 | 72.37 |
